# Supplementary material
Source: publisher site journal article supplement (https://www.dovepress.com/article/485007)
Supplement: Supplementary file 1 [file get_supplementary_file.php]

**Cannabidiol alleviates intestinal fibrosis in mice with ulcerative colitis by regulating transforming growth factor signaling pathway**

Ye Wang1,2, Xingming Ji2，3, Xinyi Wang2, Mengyu Sun2, Cheng Li2，3, Dongmei Wu4

1Key laboratory of Microecology-immune Regulatory Network and Related Diseases School of Basic Medicine, Jiamusi University, Jiamusi, People's Republic of China

2Department of Gastroenterology, Tianjin First Central Hospital, Tianjin, People's Republic of China

3School of Medicine, Nankai University, Tianjin, People's Republic of China

4School of Basic Medicine, Jiamusi University, Jiamusi, Heilongjiang, People's Republic of China

Correspondence: Dongmei Wu, Key laboratory of Microecology-immune Regulatory Network and Related Diseases School of Basic Medicine, Jiamusi University, Jiamusi, Heilongjiang Province 154000, P. R. China. Email: dmwu@jmsu.edu.cn

**Materials and methods**

Table S1. Reagents used in the experiment and their sources

| Reagent | Company |
| --- | --- |
| smooth muscle actin Polyclonal antibody（14395-1-AP） | Proteintech Group Wuhan Sanying Biological Company（1:2000） |
| Collagen Type I Polyclonal antibody（14695-1-AP） | Proteintech Group Wuhan Sanying Biological Company（1:2000） |
| TIMP2 Antibody（#DF6454） | Affinity Biosciences（1:1000） |
| MMP3 Antibody （#AF0217） | Affinity Biosciences（1:1000） |
| Smad2 Antibody（#AF6449） | Affinity Biosciences（1:1000） |
| Phospho-Smad2 (Ser467) Antibody - （#AF3449） | Affinity Biosciences（1:1000） |
| Smad3 Antibody （#AF6362） | Affinity Biosciences（1:1000） |
| Phospho-Smad3 (Ser204) Antibody - （#AF3364） | Affinity Biosciences（1:1000） |
| NRF2, NFE2L2 Polyclonal antibody（16396-1-AP） | Proteintech Group Wuhan Sanying Biological Company（1:5000） |
| TIMP1 Antibody - （#AF7007） | Affinity Biosciences（1:1000） |
| HO-1/HMOX1 Polyclonal antibody（10701-1-AP） | Proteintech Group Wuhan Sanying Biological Company（1:2000） |
| NF-κB p65 Recombinant antibody（80979-1-RR） | Proteintech Group Wuhan Sanying Biological Company（1:10000） |
| hospho-IKB alpha (Ser32/Ser36) Antibody （#AF2002） | Affinity Biosciences（1:1000） |
| TNF Alpha Polyclonal antibody（17590-1-AP） | Proteintech Group Wuhan Sanying Biological Company（1:1000） |
| IL-6 Antibody （#DF6087） | Affinity Biosciences（1:1000） |
| IL-1 beta Antibody （#AF5103） | Affinity Biosciences（1:1000） |
| TGF Beta 1 Polyclonal antibody（21898-1-AP） | Proteintech Group Wuhan Sanying Biological Company（1:2000） |
| GAPDH Monoclonal antibody(60004-1-Ig) | Proteintech Group Wuhan Sanying Biological Company（1:20000） |
|  |  |
| HRP-conjugated Affinipure Goat Anti-Mouse IgG(H+L)（SA00001-1） | Proteintech Group Wuhan Sanying Biological Company（1:10000） |
| HRP-conjugated Affinipure Goat Anti-Rabbit IgG(H+L)（SA00001-2） | Proteintech Group Wuhan Sanying Biological Company（1:10000） |
| SDS-PAGE Gel preparation kit | Dalian Meilun Biotechnology Co., LTD |
| RIPAlysate | Dalian Meilun Biotechnology Co., LTD |
| Glycine | Beijing Solaibao Technology Co., LTD |
| Tris-Base | Beijing Solaibao Technology Co., LTD |
| Sodium dodecyl sulfate (SDS) | Beijing Solaibao Technology Co., LTD |
| Color predye high molecular weight protein standard | Thermo Field |
| PVDF membrane | US. Millipore company |
| Skim milk powder | US. BD company |
| DMEM medium | Shanghai Zhongqiao Xinzhou Biotechnology Co., LTD |
| Fetal bovine serum | Gibco |
| Cyanine/streptomycin solution | Shanghai Biyuntian Biotechnology Co., LTD |
| Pancreatase | Shanghai Biyuntian Biotechnology Co., LTD |

Table S2. Primer sequence

| Item | Sequence |
| --- | --- |
| α-SMA F | AGCACGGCATCATCACCAAC |
| α-SMA R | GAGGCGTAGAGGGACAGCAC |
| Col1a1 F | CAAGGTGTTGTGCGATGACG |
| Col1a1 R | GGTTTCTTGGTCGGTGGGTG |
| MMP3 F | GGCAGTTTGCTCAGCCTATC |
| MMP3 R | TCCAGAGTGTCGGAGTCCAG |
| TIMP1 F | CTGTTGTTGCTGTGGCTGAT |
| TIMP1 R | TTGTGGGACCTGTGGAAGTA |
